# Supplementary material for: Comparison of the heat stress induced variations in DNA methylation between heat-tolerant and heat-sensitive rapeseed seedlings
Source: PubMed Central journal article supplement — Breed Sci. 2014 Jun 1;64(2):125–33. doi: 10.1270/jsbbs.64.125 (PMC4065319; doi:10.1270/jsbbs.64.125), 2014-06-01
Supplement: 64_125_1.pdf [file 64_125_1.pdf]

**Supplemental Table 1.** Sequences of adaptors and primers used for MSAP analysis

| Adaptor and primer             | <i>EcoRI</i>                                                                                                                                                                   | <i>MspI/HpaII</i>                                                                                                                                              |
|--------------------------------|--------------------------------------------------------------------------------------------------------------------------------------------------------------------------------|----------------------------------------------------------------------------------------------------------------------------------------------------------------|
| Adaptor                        | 5'-CTCGTAGACTGCGTACC-3'<br>3'-CATCTGACGCATGGTTAA-5'                                                                                                                            | 5'-GATCATGAGTCCTGCT-3'<br>3'-AGTACTCAGGACGAGC-5'                                                                                                               |
| Pre-amplification primer       | 5'-GACTGCGTACCAATTC-3' (E)                                                                                                                                                     | 5'-ATCATGAGTCCTGCTCGG-3'(HM)                                                                                                                                   |
| Selective amplification primer | E + AAA (E1)<br>E + ACT (E2)<br>E + AGT (E3)<br>E + AAT (E4)<br>E + ACA (E5)<br>E + AGA (E6)<br>E + AGC (E7)<br>E + ATA (E8)<br>E + ATT (E9)<br>E + ATC (E10)<br>E + ATG (E11) | HM + TAA (HM1)<br>HM + TCC (HM2)<br>HM + TTC (HM3)<br>HM + TCT (HM4)<br>HM + TAC (HM5)<br>HM + TGC (HM6)<br>HM + TAG (HM7)<br>HM + TTG (HM8)<br>HM + TCA (HM9) |

**Supplemental Table 2.** 47 pairs of selective amplification primers used for MSAP analysis

| Number | Combination | Number | Combination | Number | Combination |
|--------|-------------|--------|-------------|--------|-------------|
| 1      | E4/HM3      | 17     | E8/HM8      | 33     | E7/HM2      |
| 2      | E6/HM3      | 18     | E2/HM9      | 34     | E10/HM1     |
| 3      | E5/HM2      | 19     | E8/HM9      | 35     | E11/HM1     |
| 4      | E8/HM2      | 20     | E7/HM4      | 36     | E10/HM2     |
| 5      | E5/HM3      | 21     | E8/HM4      | 37     | E11/HM2     |
| 6      | E7/HM3      | 22     | E9/HM4      | 38     | E8/HM1      |
| 7      | E8/HM3      | 23     | E10/HM4     | 39     | E9/HM1      |
| 8      | E2/HM6      | 24     | E11/HM4     | 40     | E8/HM2      |
| 9      | E10/HM6     | 25     | E2/HM8      | 41     | E9/HM2      |
| 10     | E2/HM7      | 26     | E4/HM8      | 42     | E2/HM1      |
| 11     | E10/HM7     | 27     | E5/HM8      | 43     | E4/HM1      |
| 12     | E1/HM3      | 28     | E6/HM8      | 44     | E6/HM1      |
| 13     | E10/HM3     | 29     | E7/HM8      | 45     | E7/HM1      |
| 14     | E2/HM3      | 30     | E8/HM8      | 46     | E10/HM5     |
| 15     | E3/HM3      | 31     | E4/HM2      | 47     | E11/HM5     |
| 16     | E2/HM8      | 32     | E6/HM2      |        |             |

**Supplemental Table 3.** Quantitative RT-PCR primers

| Name | Sequence             | Primer<br>T <sub>m</sub> | Amplicon<br>Size |
|------|----------------------|--------------------------|------------------|
| M7F  | CATCCTGCTCATCAGCAACT | 58.99                    | 153              |
| M7R  | TACTCCAATTCACGGCAGA  | 59.27                    |                  |
| M9F  | GAAAGTGCAATGCTGTTGCT | 59.08                    | 200              |
| M9R  | TCCGCCTTCTCTTGATCTT  | 59.01                    |                  |
| M16F | AGGACTTGGCTCTTTCTGGA | 59.01                    | 152              |
| M16R | CACTCTCTCCATCACACGCT | 58.99                    |                  |
